# Supplementary material for: A Novel Peroxidase Mimics and Ameliorates Alzheimer’s Disease-Related Pathology and Cognitive Decline in Mice
Source: MDPI journal article supplement (doi:10.3390/ijms19113304), 2018-10-24
Supplement: s1 [file s1]

# A Novel Peroxidase Mimics Ameliorates Alzheimer's Disease-related Pathology and Cognitive Decline in mice

Jia Xu, Kai Wang, Ye Yuan, Hui Li, Ruining Zhang, Shuwen Guan, Liping Wang

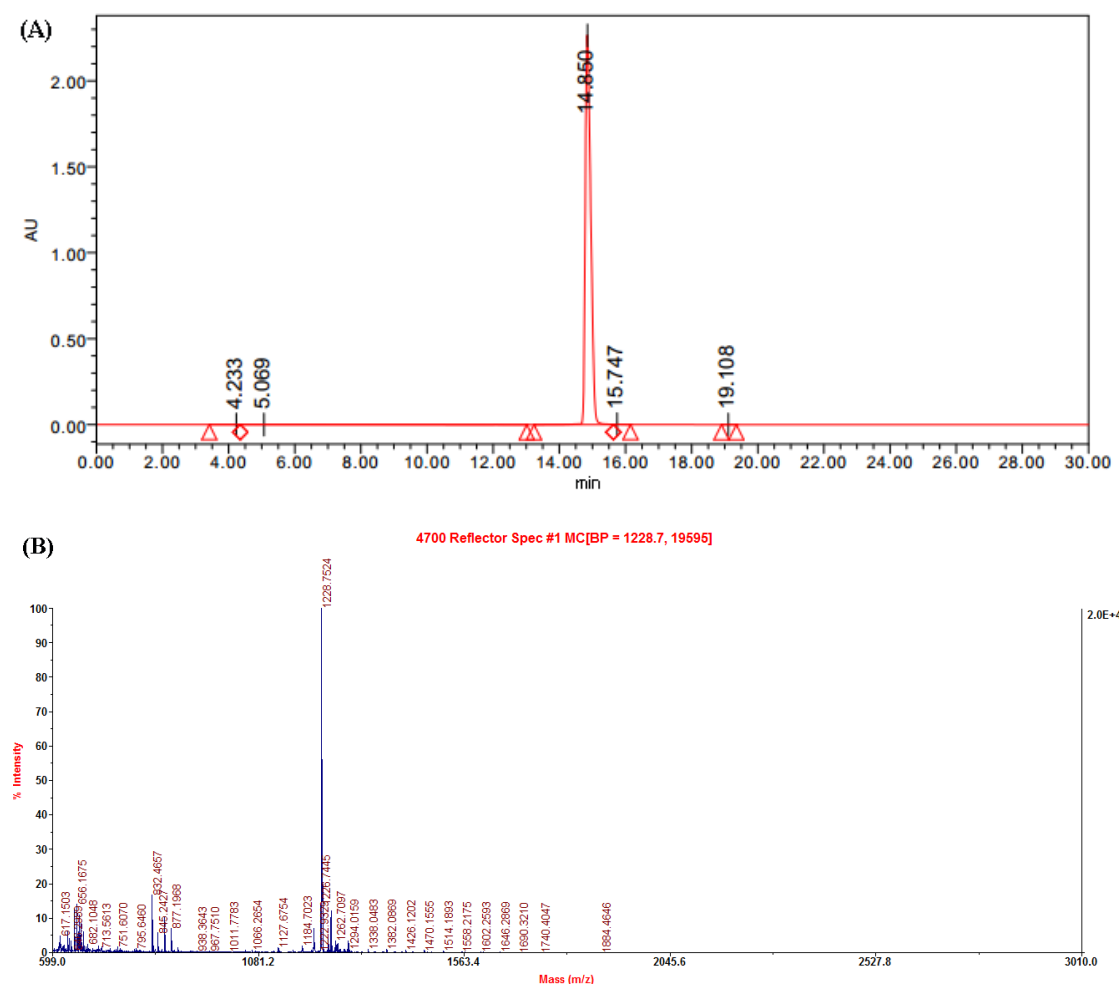

**Figure S1.** The High Performance Liquid Chromatography (A) and Time of Flight Mass Spectrometer (B) of the DhHP-6 ( $M=1228.7524\pm 1$ ).
